# Supplementary material
Source: MDPI journal article supplement (https://www.mdpi.com/2306-5710/7/4/76)
Supplement: s1 [file s1]

## Supplemental Information:

Supplemental Table S1. Total anthocyanin concentrations (mg/L) during fermentation via Wine X-ray analysis for wines in 2016 and 2017 (n=3).

| Total Anthocyanins  | 2016              |                  |                  |                   |                   |                   |                  |                   |
|---------------------|-------------------|------------------|------------------|-------------------|-------------------|-------------------|------------------|-------------------|
| Day of Fermentation | CS110 RB (-)      | CS110 RB (+)     | CS110 RB (+) 2H  | CS420 RB (-)      | CS420 RB (+)      | CS420 RB (+) 2H   |                  |                   |
| 0                   | --                | --               | --               | --                | --                | --                |                  |                   |
| 1                   | 295.33 ± 28.15 b  | 251.00 ± 28.58 b | 359.00 ± 12.53 a | 263.33 ± 19.66 b  | 242.00 ± 18.38 b  | 327.67 ± 28.01 a  |                  |                   |
| 2                   | 512.67 ± 24.66 a  | 447.67 ± 67.02 a | 512.33 ± 18.50 a | 498.67 ± 20.60 ab | 417.67 ± 48.60 b  | 524.00 ± 47.03 a  |                  |                   |
| 3                   | 750.67 ± 34.85 a  | 568.67 ± 19.40 b | 693.33 ± 22.48 a | 755.33 ± 17.01 a  | 642.00 ± 40.00 b  | 677.67 ± 64.63 ab |                  |                   |
| 4                   | 968.67 ± 37.5 a   | 673.67 ± 31.66 c | 842.00 ± 17.06 b | 925.33 ± 29.26 a  | 772.00 ± 17.35 b  | 844.67 ± 49.24 ab |                  |                   |
| 5                   | 1084.00 ± 33.42 a | 744.00 ± 29.51 c | 884.33 ± 14.01 b | 1018.00 ± 7.00 a  | 837.33 ± 13.05 b  | 858.00 ± 41.58 b  |                  |                   |
| 6                   | 1100.67 ± 27.74 a | 752.33 ± 16.65 c | 927.33 ± 11.72 b | 1017.67 ± 16.01 a | 851.00 ± 19.52 b  | 914.33 ± 39.27 b  |                  |                   |
| 7                   | 1117.00 ± 28.35 a | 753.33 ± 18.23 c | 963.33 ± 2.08 b  | 1023.67 ± 13.32 a | 857.00 ± 7.55 c   | 932.00 ± 30.79 b  |                  |                   |
| 8                   | 1097.33 ± 22.14 a | 755.00 ± 14.11 c | 970.00 ± 20.78 b | 1017.00 ± 16.46 a | 851.00 ± 11.27 c  | 938.67 ± 11.37 b  |                  |                   |
| Total Anthocyanins  | 2017              |                  |                  |                   |                   |                   |                  |                   |
| Day of Fermentation | CS110R RB (-)     | CS110R RB (+)    | CS110R RB (+) S  | CS110R RB (+) 2H  | CS420A RB (-)     | CS420A RB (+)     | CS420A RB (+) S  | CS420A RB (+) 2H  |
| 0                   | 304.00 ± 8.54 a   | 261.00 ± 25.54 a | 291.00 ± 25.06 a | 282.33 ± 10.12 a  | 255.00 ± 6.56 a   | 221.00 ± 11.79 b  | 232.00 ± 6.24 b  | 215.67 ± 3.21 b   |
| 1                   | 590.00 ± 27.73 a  | 391.67 ± 29.02 b | 388.00 ± 6.00 b  | 358.67 ± 23.18 b  | 362.67 ± 26.27 a  | 302.33 ± 25.38a   | 328.67 ± 25.72 a | 358.33 ± 20.84 a  |
| 2                   | 743.00 ± 22.91a   | 478.00 ± 41.94 b | 450.00 ± 21.00 b | 486.67 ± 29.09 b  | 564.33 ± 9.61 a   | 431.00 ± 30.05 b  | 452.00 ± 15.62 b | 528.33 ± 26.63 a  |
| 3                   | 851.67 ± 16.26 a  | 576.00 ± 27.22 c | 526.67 ± 19.30 c | 642.67 ± 11.68 b  | 762.00 ± 16.37 a  | 598.33 ± 19.66 b  | 557.67 ± 74.54 b | 659.67 ± 23.18 ab |
| 4                   | 900.33 ± 13.43 a  | 629.33 ± 28.02 c | 573.33 ± 7.23 d  | 702.67 ± 6.81 b   | 855.00 ± 19.97 a  | 674.00 ± 13.08 bc | 611.33 ± 85.24 c | 745.33 ± 13.20 ab |
| 5                   | 950.33 ± 11.93 a  | 671.00 ± 25.51 c | 613.00 ± 8.19 d  | 780.67 ± 5.13 b   | 931.00 ± 20.52 a  | 724.67 ± 14.47 bc | 666.33 ± 55.08 c | 791.33 ± 10.97 b  |
| 6                   | 992.00 ± 9.54 a   | 702.67 ± 20.84 c | 650.67 ± 3.21 d  | 808.67 ± 2.08 b   | 973.33 ± 15.57 a  | 751.33 ± 22.01 c  | 702.33 ± 30.62 c | 812.00 ± 6.93 b   |
| 7                   | 1000.33 ± 11.59 a | 711.33 ± 16.80 c | 673.00 ± 7.00 d  | 828.33 ± 13.65 b  | 1006.00 ± 14.73 a | 769.00 ± 20.95 c  | 734.00 ± 14.73 c | 815.33 ± 5.86 b   |
| 8                   | 996.33 ± 10.97 a  | 711.67 ± 15.28 c | 685.67 ± 8.14 c  | 792.33 ± 23.76 b  | 991.67 ± 14.29 a  | 757.67 ± 23.03 c  | 737.00 ± 13.45 c | 812.67 ± 3.06 b   |
| 9                   | 1000.00 ± 40.15 a | 682.00 ± 13.45 c | 661.33 ± 12.66 c | 812.00 ± 22.52 b  | --                | --                | --               | --                |

Difference in letters indicates a significant difference between treatments for each rootstock after applying Tuckey's HSD test ( $p < 0.05$ ). CS110= Cabernet Sauvignon 110R, CS420= Cabernet Sauvignon 420A, RB=red blotch, (-)=negative, and (+)=positive, 2H= second harvest, NS= no sugar, S= chaptalization, ME=malvidin-3-glucoside equivalents, and CE=catechin equivalents.

Supplemental Table S2. Total tannin concentrations during fermentation by Wine X-ray analysis for wines in 2016 and 2017 (n=3).

| Total Tannins       | 2016             |                  |                  |                   |                   |                  |                   |                  |
|---------------------|------------------|------------------|------------------|-------------------|-------------------|------------------|-------------------|------------------|
| Day of Fermentation | CS110 RB (-)     | CS110 RB (+)     | CS110 RB (+) 2H  | CS420 RB (-)      | CS420 RB (+)      | CS420 RB (+) 2H  |                   |                  |
| 0                   | --               | --               | --               | --                | --                | --               |                   |                  |
| 1                   | 24.00 ± 0.00 a    | 24.00 ± 0.00 a    | 24.00 ± 0.00 a   |                   |                  |
| 2                   | 24.00 ± 0.00 a    | 24.00 ± 0.00 a    | 24.00 ± 0.00 a   |                   |                  |
| 3                   | 24.00 ± 0.00 b   | 24.00 ± 0.00 b   | 109.00 ± 28.35 a | 87.00 ± 19.67 b   | 153.00 ± 53.08 ab | 240.00 ± 75.48 a |                   |                  |
| 4                   | 229.67 ± 28.29 a | 83.00 ± 35.16 b  | 301.67 ± 24.01 a | 333.67 ± 45.37 b  | 380.33 ± 15.37 ab | 469.33 ± 65.59 a |                   |                  |
| 5                   | 377.67 ± 21.22 a | 212.33 ± 35.70 b | 395.00 ± 19.29 a | 458.67 ± 42.15 a  | 504.33 ± 13.01 a  | 525.33 ± 56.32 a |                   |                  |
| 6                   | 422.33 ± 15.70 b | 235.67 ± 18.58 c | 485.33 ± 15.31a  | 476.67 ± 58.23 a  | 539.67 ± 21.73 a  | 601.00 ± 99.80 a |                   |                  |
| 7                   | 499.00 ± 17.32 a | 278.33 ± 38.80 b | 527.67 ± 4.51a   | 524.00 ± 55.57 b  | 582.33 ± 2.52 ab  | 657.00 ± 35.93 a |                   |                  |
| 8                   | 598.67 ± 19.66 a | 363.67 ± 22.50 b | 599.00 ± 29.51a  | 623.67 ± 92.51 a  | 674.33 ± 17.62 a  | 733.00 ± 7.00 a  |                   |                  |
| Total Tannins       | 2017             |                  |                  |                   |                   |                  |                   |                  |
| Day of Fermentation | CS110R RB (-)    | CS110R RB (+)    | CS110R RB (+) S  | CS110R RB (+) 2H  | CS420A RB (-)     | CS420A RB (+)    | CS420A RB (+) S   | CS420A RB (+) 2H |
| 0                   | 24.00 ± 0.00 a    | 24.00 ± 0.00 a    | 24.00 ± 0.00 a   | 24.00 ± 0.00 a    | 24.00 ± 0.00 a   |
| 1                   | 24.00 ± 0.00 a    | 24.00 ± 0.00 a    | 24.00 ± 0.00 a   | 24.00 ± 0.00 a    | 24.00 ± 0.00 a   |
| 2                   | 115.00 ± 20.30 a | 31.67 ± 13.28 b  | 24.00 ± 0.00 b   | 24.00 ± 0.00 b    | 24.00 ± 0.00 a    | 24.00 ± 0.00 a   | 24.00 ± 0.00 a    | 51.67 ± 22.50 a  |
| 3                   | 293.67 ± 10.02 a | 172.00 ± 38.97 b | 77.33 ± 31.72 c  | 146.00 ± 27.18 bc | 259.33 ± 10.41 a  | 235.00 ± 33.60 a | 177.33 ± 129.25 a | 246.67 ± 19.09 a |
| 4                   | 404.00 ± 3.00 a  | 286.00 ± 44.40 b | 193.67 ± 17.67 c | 274.67 ± 7.51 b   | 408.33 ± 13.65 a  | 387.67 ± 37.07 a | 299.00 ± 169.58 a | 435.67 ± 18.18 a |
| 5                   | 517.67 ± 8.14 a  | 391.00 ± 48.87 b | 309.33 ± 11.93 c | 428.67 ± 4.04 b   | 563.00 ± 13.45 a  | 507.67 ± 27.32 a | 438.67 ± 126.62 a | 540.00 ± 19.47 a |
| 6                   | 568.00 ± 8.00 a  | 444.67 ± 45.21 b | 371.00 ± 10.00 c | 519.33 ± 13.50 a  | 677.67 ± 9.07 a   | 594.00 ± 21.00 a | 551.33 ± 93.60 a  | 581.67 ± 14.84 a |
| 7                   | 625.33 ± 4.04 a  | 505.67 ± 45.08 b | 444.00 ± 13.89 b | 606.33 ± 15.57 a  | 749.33 ± 8.08 a   | 656.67 ± 10.02 b | 638.33 ± 62.40 b  | 636.67 ± 8.50 b  |
| 8                   | 669.00 ± 7.81 a  | 554.67 ± 44.60 b | 534.00 ± 20.30 b | 592.00 ± 24.58 b  | 771.67 ± 7.37 a   | 676.00 ± 4.36 b  | 679.33 ± 57.55 b  | 675.33 ± 12.66 b |
| 9                   | 813.33 ± 22.14 a | 629.00 ± 33.81 b | 611.33 ± 15.14 b | 667.00 ± 32.45 b  | --                | --               | --                | --               |

Difference in letters indicates a significant difference between treatments after applying Tuckey's HSD test ( $p < 0.05$ ). CS110= Cabernet Sauvignon 110R, CS420= Cabernet Sauvignon 420A, RB=red blotch, (-)=negative, and (+)=positive, 2H= second harvest, NS= no sugar, S= chaptalization, ME=malvidin-3-glucoside equivalents, and CE=catechin equivalents.

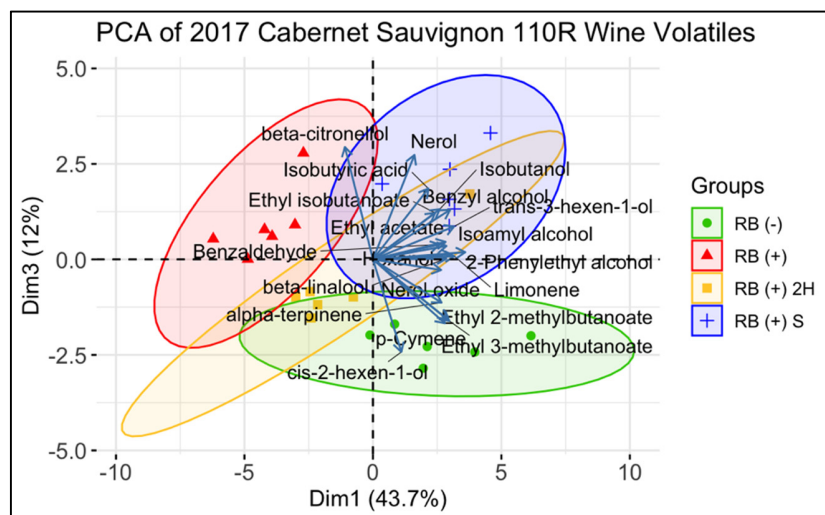

Supplemental Figure S1. Principal component analysis of the first and third dimension for volatile compounds in CS 110R wines made in 2017. Ellipses are drawn to 95% confidence with an n=6 for two bottle replicates for each fermentor replicate. Only the highest 20 significant volatile compounds that contribute to the variance are plotted. CS110= Cabernet Sauvignon 110R, RB=red blotch, (-)=negative, and (+)=positive, 2H= second harvest, S=chaptalization.

Supplemental Table S3. Significantly different sensory attributes of wines made in 2016 and 2017 as determined through descriptive analysis.

|                   | 2016           |                |                |                |                   |                |                |               |
|-------------------|----------------|----------------|----------------|----------------|-------------------|----------------|----------------|---------------|
| Sensory Attribute | CS110R         |                |                |                | Sensory Attribute | CS420A         |                |               |
|                   | RB (-)         | RB (+)         | RB (+) 2H      |                |                   | RB (-)         | RB (+)         | RB (+) 2H     |
| Sour              | 1.88 ± 0.38 b  | 2.35 ± 0.43 a  | 2.27 ± 0.17 ab |                | Alcohol           | 2.75 ± 0.32 a  | 2.32 ± 0.28 b  | 2.84 ± 0.34 a |
| Hot               | 2.29 ± 0.23 a  | 1.48 ± 0.22 c  | 1.74 ± 0.17 b  |                | Sweet             | 1.93 ± 0.37 ab | 1.57 ± 0.39 b  | 2.03 ± 0.34 a |
| Dry               | 1.86 ± 0.30 b  | 1.65 ± 0.19 b  | 2.15 ± 0.22 a  |                | Viscous           | 2.17 ± 0.34 b  | 2.24 ± 0.41 ab | 2.58 ± 0.24 a |
| Viscous           | 2.58 ± 0.27 a  | 2.21 ± 0.46 a  | 2.22 ± 0.35 a  |                |                   |                |                |               |
| Color             | 23.19 ± 0.97 a | 18.36 ± 1.64 b | 22.11 ± 1.35 a |                |                   |                |                |               |
|                   | 2017           |                |                |                |                   |                |                |               |
| Sensory Attribute | CS110R         |                |                |                | Sensory Attribute | CS420A         |                |               |
|                   | RB (-)         | RB (+)         | RB (+) S       | RB (+) 2H      |                   | RB (-)         | RB (+)         | RB (+) S      |
| Dark Fruit        | 3.59 ± 0.31 a  | 2.27 ± 0.55 c  | 2.37 ± 0.80 bc | 3.20 ± 0.51 ab | Hot               | 4.60 ± 0.58 a  | 3.28 ± 0.54 b  | 4.23 ± 0.45 a |
| Red Cherry        | 2.59 ± 0.44 a  | 1.61 ± 0.77 b  | 1.22 ± 0.43 b  | 2.93 ± 0.63 a  |                   |                |                |               |
| Vanilla           | 1.51 ± 0.22 a  | 1.26 ± 0.30 ab | 0.90 ± 0.49 b  | 1.84 ± 0.42 a  |                   |                |                |               |
| Black Pepper      | 1.20 ± 0.47 ab | 1.45 ± 0.47 a  | 1.79 ± 0.50 a  | 0.63 ± 0.31 b  |                   |                |                |               |
| Barnyard          | 1.79 ± 0.74 b  | 2.74 ± 0.53 a  | 2.80 ± 0.52 a  | 1.69 ± 0.51 b  |                   |                |                |               |
| Soil              | 0.71 ± 0.37 a  | 0.92 ± 0.44 a  | 1.16 ± 0.50 a  | 0.55 ± 0.31 a  |                   |                |                |               |
| Savory            | 1.56 ± 0.68 bc | 2.59 ± 0.82 ab | 3.08 ± 0.80 a  | 1.40 ± 0.51 c  |                   |                |                |               |
| Astringency       | 3.62 ± 0.75 ab | 3.97 ± 0.41 a  | 4.54 ± 0.89 a  | 2.55 ± 0.71 b  |                   |                |                |               |
| Hot               | 4.15 ± 1.21 ab | 2.98 ± 0.67 b  | 4.27 ± 0.51 a  | 3.56 ± 0.55 ab |                   |                |                |               |

CS110R= Cabernet Sauvignon 110R, CS420A= Cabernet Sauvignon 420A, RB=red blotch, (-)=negative, and (+)=positive, 2H= second harvest, S=chaptalization. Difference in lettering indicates a significant difference between RB(-) and RB(+) after applying Tuckey's HSD test (p<0.05).

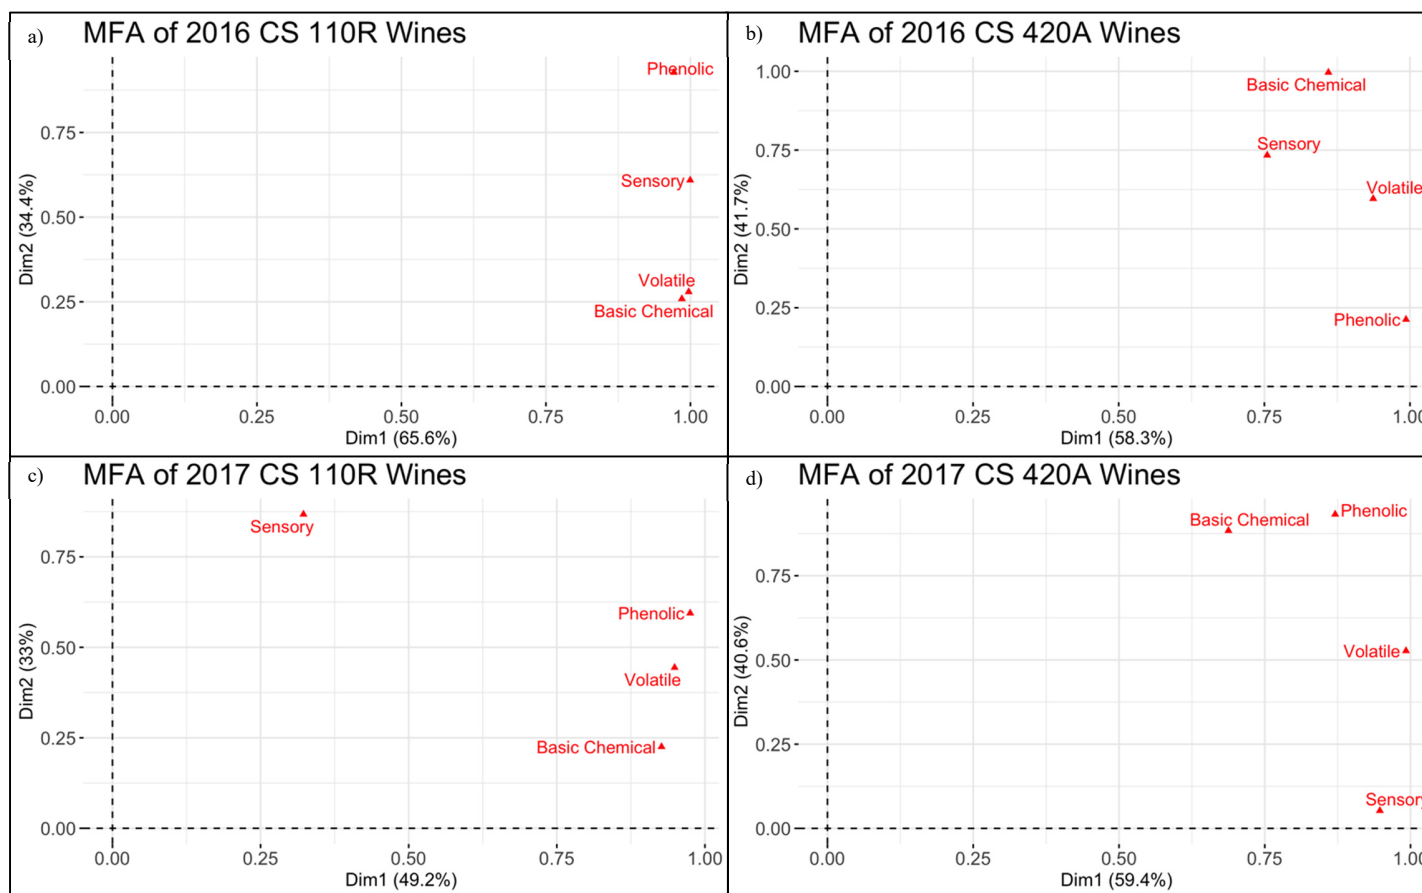

Supplemental Figure S2. Multifactor analysis of the groups of variables that were used to analyze the wines: sensory profile volatile profile, phenolic profile, and basic chemical parameters at bottling. a) CS 110R wines made in 2016, b) CS 420A wines made in 2016, c) CS 110R wines made in 2017, and d) CS 420A wines made in 2017. CS110= Cabernet Sauvignon 110R, and CS420= Cabernet Sauvignon 420A.

Supplemental Table S4. RV coefficients to compare each data set in the multifactor analysis of each rootstock and season. Significant RV coefficients are indicated in bold lettering.

| Comparison                  | RV Coefficient  |                 |                 |                 |
|-----------------------------|-----------------|-----------------|-----------------|-----------------|
|                             | CS 110R<br>2016 | CS 420A<br>2016 | CS 110R<br>2017 | CS 420A<br>2017 |
| Sensory vs. Phenolic        | 0.28            | 0.43            | <b>0.81</b>     | 0.09            |
| Sensory vs. Volatile        | <b>0.80</b>     | 0.47            | 0.28            | 0.51            |
| Sensory vs. Basic Chemical  | <b>0.76</b>     | <b>0.51</b>     | 0.18            | <b>0.68</b>     |
| Phenolic vs. Volatile       | <b>0.80</b>     | 0.22            | 0.24            | 0.19            |
| Phenolic vs. Basic Chemical | 0.10            | 0.33            | 0.16            | 0.04            |
| Volatile vs. Basic Chemical | <b>0.91</b>     | <b>0.86</b>     | <b>0.56</b>     | <b>0.82</b>     |

CS= Cabernet Sauvignon, phenolic= phenolic profile of wines, volatile= volatile profile of wines, basic chemical= chemical data from bottling

Supplemental Table S5. List of sensory attributes that were used in 2016 and the recipes to make each sensory standard.

| <b>Aroma</b>     |               | <b>Recipe</b>                                                                                                                                                                         |
|------------------|---------------|---------------------------------------------------------------------------------------------------------------------------------------------------------------------------------------|
| 1                | dark fruit    | three thawed crushed blackberry plus 1 frozen dark cherry                                                                                                                             |
| 2                | strawberry    | 2 small pieces of frozen strawberry + 10 ml wine                                                                                                                                      |
| 3                | banana -fresh | 1 x 1cm circle of fresh banana, no peel                                                                                                                                               |
| 4                | pear          | 20 mL R.W. Knudsen Pear juice + 10 grams of fresh pear                                                                                                                                |
| 5                | apple         | 15 g sliced fresh Grannysmith green apple, 20 mL base wine                                                                                                                            |
| 6                | citrus        | 0.15 g fresh tangerine peel + 0.1 g fresh lemon peel + 0.1 g fresh grapefruit peel                                                                                                    |
| 7                | fresh veg     | 10 g McCains Frozen Sliced Green Beans + 10 g McCains Frozen Green Peas + 1 g bell pepper NO WINE                                                                                     |
| 8                | vegetation    | 0.1 g "birdsfoot trefoil green" +0.1 g "assorted green leaves"                                                                                                                        |
| 9                | floral        | 1/2 tspn Rose water (Monin) + Few Dry petals + 1/2 tspn Violet water                                                                                                                  |
| 10               | spice         | 1/2 tsp all spice                                                                                                                                                                     |
| 11               | leather       | 20 mL base wine plus 2 leather show lace strips, 3 inches brown, 3 inches tan                                                                                                         |
| 12               | vanilla       | 2ml McCormick Pure Vanilla extract + 25 ml wine                                                                                                                                       |
| 13               | earthy        | 0.3 g dried mushroom 1 tps potting soil + 2 drops of water                                                                                                                            |
| 14               | oak           | 1 Am Oak cube M+ with 1 French Oak Cube Light + 1 Fench Oak Cube M in 20 mL wine                                                                                                      |
| 15               | alcohol       | 20 mL Everclear 30 mL base wine                                                                                                                                                       |
| 16               | yeasty        | 1/8 teaspoon active dry yeast + 10 mL demineralized water                                                                                                                             |
| 17               | mineral       | 1 tbsp gravel in 5 mL mineral water (investigate other rocks and decarbonated sparkling water)                                                                                        |
| 18               | black pepper  | two turns of black pepper mill                                                                                                                                                        |
| <b>Taste</b>     |               | <b>Recipe</b>                                                                                                                                                                         |
| 1                | sour          | 3.5 g/L tartaric acid                                                                                                                                                                 |
| 2                | bitter        | 1.25 g/L caffeine                                                                                                                                                                     |
| 3                | sweet         | 20 g/L sucrose                                                                                                                                                                        |
| <b>Mouthfeel</b> |               | <b>Recipe</b>                                                                                                                                                                         |
| 1                | hot           | Alcohol Hotness (300 mL/L seagrams vodka)                                                                                                                                             |
| 2                | dry           | Dry (1.3 g/L alum)                                                                                                                                                                    |
| 3                | viscous       | Viscous (3 g/L CMC)                                                                                                                                                                   |
| 4                | grippy        | Drawing or tightening sensation felt in the mouth, lips and/or cheeks, lack of slip between mouth surfaces resulting in the inability to easily move mouth surfaces across each other |
| 5                | puckery       | white vinegar (200 mL/L)                                                                                                                                                              |
| 6                | effervescent  | sparkling mineral water                                                                                                                                                               |

Supplemental Table S6. List of sensory attributes used in 2017 and the recipes to make each sensory standard.

| <b>Aroma</b>     |                        | <b>Recipe</b>                                                                                                                       |
|------------------|------------------------|-------------------------------------------------------------------------------------------------------------------------------------|
| 1                | dark fruit             | 3 thawed crushed blackberries + 1 thawed dark cherry + 5ml of black currant juice+1 teaspoon of black currant jam+10ml of base wine |
| 2                | strawberry             | 1 small, cut, thawed strawberry                                                                                                     |
| 3                | red cherry             | 3 crushed, fresh cherries + 1/2 tablespoon of black cherry jam +10 ml of black cherry juice                                         |
| 4                | dried fruit            | 2g of raisins + 2g of dates + 2g of appricots all crushed                                                                           |
| 5                | green                  | 5 g Frozen Sliced Green Beans + 4 blades of grass + 5 g bell pepper                                                                 |
| 6                | chocolate              | 10g of dark chocolate (baking chocolate)                                                                                            |
| 7                | soil/earthy            | 1 teaspoon of potting soil + 2.5g of fresh chopped mushroom + 10ml of mineral water                                                 |
| 8                | musty                  | 1g of ripped cardboard + 5mL of tap water                                                                                           |
| 9                | wood cedar             | 1 piece of ceddar + 10ml of base wine                                                                                               |
| 10               | black pepper           | 2 pinches of black peppper                                                                                                          |
| 11               | mulling spice +vanilla | 1/8 teaspoon cinnamon + 1/8 teaspoon whole all spice + 1/8 teaspoon ground cloves + 1 drop of vanilla + 40ml of base wine           |
| 12               | barnyard               | 1/8 teaspoon white pepper + 20ml base wine                                                                                          |
| 13               | floral                 | (3 drops) of rose water+ 3 drops of orange blossom+20ml of base wine                                                                |
| 14               | flint/mineral          | 5 rocks + 10mL of tap water                                                                                                         |
| 15               | savory                 | 1 drop of liquid smoke+ 50ml of base wine                                                                                           |
| 16               | alcohol                | 20 mL Everclear Vodka + 30 mL base wine                                                                                             |
| <b>Taste</b>     |                        | <b>Recipe</b>                                                                                                                       |
| 1                | Sour                   | 3 g/L tartaric acid                                                                                                                 |
| 2                | Bitter                 | 1.5 g/L Caffein                                                                                                                     |
| 3                | Sweet                  | 15g/L sucrose                                                                                                                       |
| 4                | Salty                  | 2 g/L table salt                                                                                                                    |
| <b>Mouthfeel</b> |                        | <b>Recipe</b>                                                                                                                       |
| 1                | Hot/Burning            | 350ml/L of Vodka in water; 150ml/L of Vodka; 50ml/L of Vodka                                                                        |
| 2                | Viscous                | 3g/L of CMC in water; 1.5g/L of CMC; pure water                                                                                     |
| 3                | Astringent             | 3g/L of Alum in water; 1.5g/L of Alum; 0.5/L Alum                                                                                   |
